# Supplementary material for: A Bad Case of Good’s Syndrome
Source: Springer Nature journal article supplement (doi:10.1007/s40121-014-0045-7), 2014-10-06
Supplement: MOESM1 [file 9339658]

- Good's syndrome is a relatively rare immunodeficiency condition that presents in the fourth or fifth decade of life and is defined by hypogammaglobulinemia in the setting of a thymoma.
- The humoral immune system defect in Good's syndrome may be severe enough to cause an absence in B cells, with a consequent recurrence of sinopulmonary disease, chronic non-infectious diarrhea, and opportunistic infections.
- The prognosis in patients with Good's syndrome appears to be worse than in those with other humoral system defects such as X-linked agammaglobulinemia (XLA) and common variable immune deficiency (CVID).
- On rare occasions, Good's syndrome may be associated with mycobacterium and non-mycobacterial cavitary lesions in the lungs.
- Early diagnosis and treatment of Good's syndrome may help avert complications and limit morbidity and mortality.

This summary slide represents the opinions of the authors. No funding or sponsorship was received for this study or publication of this article. For a full list of acknowledgments and conflicts of interest for all authors of this article, please see the full text online. Copyright © The Author(s) 2014. Creative Commons Attribution Noncommercial License (CC BY-NC).
